# Supplementary material for: Maternal Seafood Consumption during Pregnancy and Cardiovascular Health of Children at 11 Years of Age
Source: MDPI journal article supplement (doi:10.3390/nu16070974), 2024-03-27
Supplement: s1 [file s1]

# Supplementary Material

## Maternal Seafood Consumption during Pregnancy and Cardiovascular Health of Children at 11 Years of Age

**Ariadna Pinar-Martí**<sup>1,2,3,†</sup>, **Sílvia Fernández-Barrés**<sup>2,†</sup>, **Iolanda Lázaro**<sup>4,5</sup>, **Serena Fossati**<sup>2</sup>, **Silvia Fochs**<sup>2</sup>, **Núria Pey**<sup>2</sup>, **Martine Vrijheid**<sup>2,3,6</sup>, **Dora Romaguera**<sup>2,5,7</sup>, **Aleix Sala-Vila**<sup>4,5</sup> and **Jordi Julvez**<sup>1,2,3,6,8,\*</sup>

<sup>1</sup> Clinical and Epidemiological Neuroscience (NeuroÈpia), Institut d'Investigació Sanitària Pere Virgili (IISPV), 43204 Reus, Spain; [ariadna.pinar@iispv.cat](mailto:ariadna.pinar@iispv.cat)

<sup>2</sup> ISGlobal-Instituto de Salud Global de Barcelona-Campus MAR, PRBB, 08003 Barcelona, Spain; [silviabarres@gmail.com](mailto:silviabarres@gmail.com) (S.F.-B.); [serena.fossati@isglobal.org](mailto:serena.fossati@isglobal.org) (S.F.); [silvia.fochs@isglobal.org](mailto:silvia.fochs@isglobal.org) (S.F.); [nuria.pey@isglobal.org](mailto:nuria.pey@isglobal.org) (N.P.); [martine.vrijheid@isglobal.org](mailto:martine.vrijheid@isglobal.org) (M.V.); [dora.romaguera@isglobal.org](mailto:dora.romaguera@isglobal.org) (D.R.)

<sup>3</sup> Departament de Medicina i Ciències de la Vida (MELIS), Universitat Pompeu Fabra (UPF), 08003 Barcelona, Spain

<sup>4</sup> Cardiovascular Risk and Nutrition, Hospital del Mar Medical Research Institute (IMIM), 08003 Barcelona, Spain; [ilazaro@researchmar.net](mailto:ilazaro@researchmar.net) (I.L.); [asala3@imim.es](mailto:asala3@imim.es) (A.S.-V.)

<sup>5</sup> Centro de Investigación Biomédica en Red de Fisiopatología de la Obesidad y Nutrición (CIBEROBN), Instituto de Salud Carlos III, 28029 Madrid, Spain

<sup>6</sup> Centro de Investigación Biomédica en Red de Epidemiología y Salud Pública (CIBERESP), Instituto de Salud Carlos III, 28029 Madrid, Spain

<sup>7</sup> Health Research Institute of the Balearic Islands (IdISBa), 07120 Palma de Mallorca, Spain

<sup>8</sup> Departament de Bioquímica i Biotecnologia, Unitat de Nutrició Humana, Universitat Rovira i Virgili, 43201 Reus, Spain

\* Correspondence: [jordi.julvez@iispv.cat](mailto:jordi.julvez@iispv.cat)

† These authors contributed equally to this work.

**Figure S1. Directed Acyclic Graph (DAG) for investigating casual paths (possible confounders) between maternal seafood consumption during pregnancy and offspring cardiovascular health.**

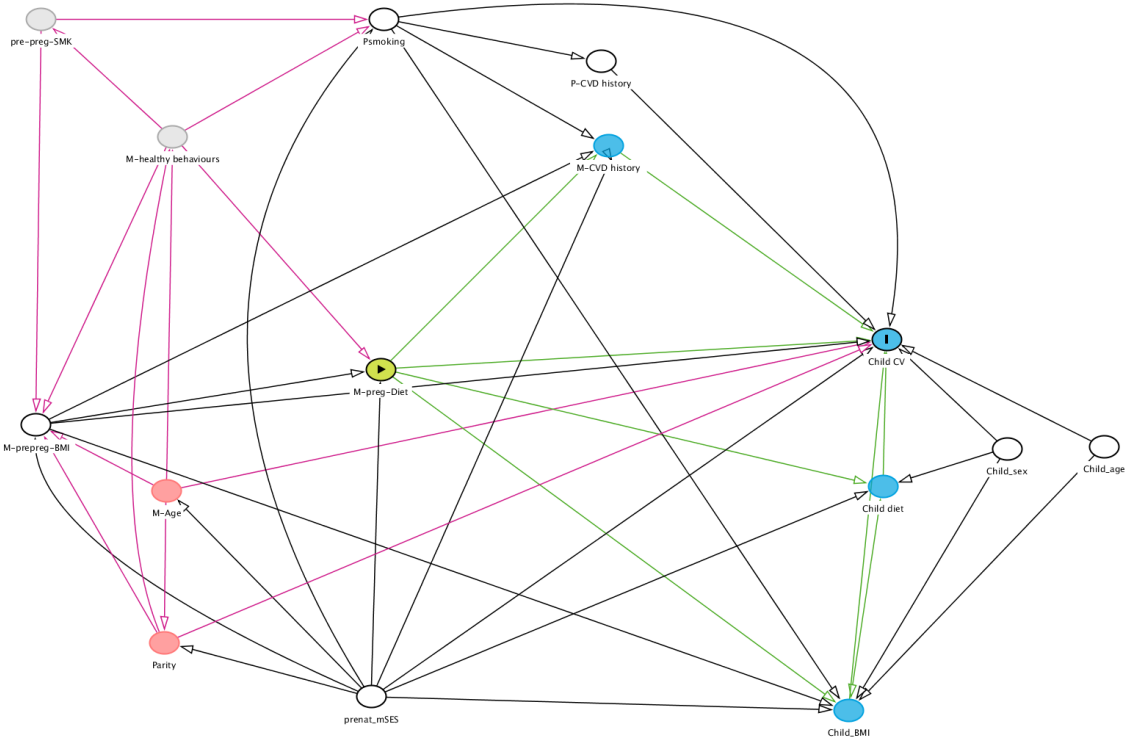

| <b>Table S1. Description of maternal fish intake * at 1<sup>st</sup> and 3<sup>rd</sup> trimesters</b> |          |             |           |               |            |
|--------------------------------------------------------------------------------------------------------|----------|-------------|-----------|---------------|------------|
|                                                                                                        | <b>N</b> | <b>mean</b> | <b>SD</b> | <b>median</b> | <b>IQR</b> |
| <b>Maternal fish intake 1<sup>st</sup> trimester, g</b>                                                | 432      |             |           |               |            |
| Total fish intake                                                                                      |          | 482.5       | 245.5     | 451.9         | 345.5      |
| Large fatty fish                                                                                       |          | 41.7        | 74.0      | 0.0           | 47.1       |
| Small fatty fish                                                                                       |          | 57.8        | 71.4      | 47.1          | 100.5      |
| Canned Tuna                                                                                            |          | 78.5        | 69.1      | 50.1          | 126.7      |
| Lean fish                                                                                              |          | 218.7       | 156.7     | 201.0         | 201.0      |
| Shellfish                                                                                              |          | 67.3        | 50.6      | 54.1          | 73.7       |
| Processed fish (surimi)                                                                                |          | 11.6        | 31.2      | 0.0           | 0.0        |
| Smoked/salted fish                                                                                     |          | 6.8         | 16.5      | 0.0           | 14.1       |
| <b>Maternal fish intake 3<sup>rd</sup> trimester, g</b>                                                | 430      |             |           |               |            |
| Total fish intake                                                                                      |          | 467.3       | 251.9     | 433.8         | 315.4      |
| Large fatty fish                                                                                       |          | 39.2        | 72.5      | 0.0           | 47.1       |
| Small fatty fish                                                                                       |          | 58.8        | 76.5      | 47.1          | 100.5      |
| Canned Tuna                                                                                            |          | 73.4        | 64.0      | 50.1          | 126.7      |
| Lean fish                                                                                              |          | 213.2       | 147.4     | 201.0         | 201.0      |
| Shellfish                                                                                              |          | 63.8        | 48.1      | 54.1          | 52.2       |
| Processed fish (surimi)                                                                                |          | 11.4        | 65.7      | 0.0           | 0.0        |
| Smoked/salted fish                                                                                     |          | 7.3         | 13.5      | 0.0           | 14.1       |
| * Weekly fish intake                                                                                   |          |             |           |               |            |
| SD: standard deviation; IQR, interquartile range.                                                      |          |             |           |               |            |

**Table S2. Description of cardiovascular outcomes in INMA Sabadell children/offspring at 11 years of age**

| <b>Outcome</b>                        | <b>N</b> | <b>% missings</b> | <b>mean</b> | <b>SD</b> |
|---------------------------------------|----------|-------------------|-------------|-----------|
| <b>CRAE, <math>\mu\text{m}</math></b> | 401      | 40.0              | 181.1       | 12.8      |
| <b>CRVE, <math>\mu\text{m}</math></b> | 401      | 40.0              | 252.2       | 17.3      |
| <b>PWV, m/s</b>                       | 416      | 36.7              | 4.4         | 0.5       |

% missings from initial sample of recruited women

SD: standard deviation; CRAE: Central retinal artery equivalent; CRVE: Central retinal vein equivalent; PWV: Pulse wave velocity.

**Table S3. Association between tertiles of maternal fish intake (1<sup>st</sup> trimester of pregnancy) and cardiovascular outcomes in INMA Sabadell children/offspring at 11 years of age**

|             |     | T <sub>1</sub><br>(N=147, 33.9%) | T <sub>2</sub><br>(N=142, 32.7%) | T <sub>3</sub><br>(N=143, 32.9 %) |                    |
|-------------|-----|----------------------------------|----------------------------------|-----------------------------------|--------------------|
| Outcome     | N   | β (95% CI)                       | β (95% CI)                       | β (95% CI)                        | <i>p</i> for Trend |
| <b>CRAE</b> |     |                                  |                                  |                                   |                    |
| Model 1     | 386 | 1.0 (Ref)                        | 2.1 (-5.3, 1.1)                  | -1.9 (-5.2, 1.3)                  | 0.245              |
| Model 2     | 386 | Ref                              | -2.1 (5.3, 1.1)                  | -2.0 (-5.3, 1.1)                  | 0.236              |
| Model 3     | 386 | Ref                              | -2.2 (-5.4, 1.0)                 | -1.9 (-5.1, 1.4)                  | 0.264              |
| Model 4     | 385 | Ref                              | -2.2 (-5.4, 1.0)                 | -1.7 (-5.0, 1.6)                  | 0.306              |
| Model 5     | 190 | Ref                              | -3.5 (-8.1, 1.2)                 | -2.6 (-7.3, 2.2)                  | 0.272              |
| Model 6     | 383 | Ref                              | -2.2 (-5.4, 1.0)                 | -1.5 (-4.9, 1.8)                  | 0.367              |
| <b>CRVE</b> |     |                                  |                                  |                                   |                    |
| Model 1     | 386 | Ref                              | -1.6 (-5.9, 2.8)                 | 1.0 (-3.4, 5.5)                   | 0.642              |
| Model 2     | 386 | Ref                              | -1.5 (-5.8, 2.9)                 | 1.0 (-3.4, 5.4)                   | 0.664              |
| Model 3     | 386 | Ref                              | -1.6 (-5.9, 2.8)                 | 1.0 (-3.4, 5.5)                   | 0.648              |
| Model 4     | 385 | Ref                              | -1.5 (-5.8, 2.9)                 | 1.39 (-3.1, 5.8)                  | 0.541              |
| Model 5     | 190 | Ref                              | -1.3 (-7.7, 5.2)                 | 2.7 (-3.8, 9.3)                   | 0.422              |
| Model 6     | 383 | Ref                              | -1.3 (-5.6, 3.1)                 | 2.1 (-2.4, 6.6)                   | 0.366              |
| <b>PWV</b>  |     |                                  |                                  |                                   |                    |
| Model 1     | 400 | Ref                              | 0.0 (-0.1, 0.1)                  | 0.0 (-0.1, 0.1)                   | 0.898              |
| Model 2     | 400 | Ref                              | 0.0 (-0.1, 0.1)                  | 0.0 (-0.1, 0.1)                   | 0.843              |
| Model 3     | 400 | Ref                              | 0.0 (-0.1, 0.1)                  | 0.0 (-0.1, 0.1)                   | 0.926              |
| Model 4     | 400 | Ref                              | 0.0 (-0.1, 0.1)                  | 0.0 (-0.1, 0.1)                   | 0.962              |
| Model 5     | 202 | Ref                              | 0.1 (-0.1, 0.2)                  | 0.0 (-0.1, 0.2)                   | 0.770              |
| Model 6     | 398 | Ref                              | 0.0 (-0.1, 0.1)                  | 0.0 (-0.1, 0.1)                   | 0.832              |

CI: confidence interval; CRAE: Central retinal artery equivalent; CRVE: Central retinal vein equivalent; PWV: Pulse wave velocity.

Data obtained by linear regression analysis.

Model 1: adjusted for child age, child sex, maternal education, maternal social class, total energy intake, maternal age, paternal cardiovascular history, parity, maternal smoking during pregnancy and maternal pre-pregnancy body mass index

Model 2: Model 1 further adjusted for child height

Model 3: Model 1 further adjusted for child z-score body mass index

Model 4: model 1 further adjusted for blood pressure

Model 5: Model 1 further adjusted for child LDL-cholesterol (9 years visit)

Model 6: Model 1 further adjusted for child fish intake at 11 years (servings per week)

**Table S4. Association between tertiles of maternal fish intake (3<sup>rd</sup> trimester of pregnancy) and cardiovascular outcomes in INMA Sabadell children/offspring at 11 years of age**

|             |     | T <sub>1</sub><br>(N=146, 33.6%) | T <sub>2</sub><br>(N=150, 34.6%) | T <sub>3</sub><br>(N=134, 30.9 %) |                    |
|-------------|-----|----------------------------------|----------------------------------|-----------------------------------|--------------------|
| Outcome     | N   | β (95%CI)                        | β (95%CI)                        | β (95%CI)                         | <i>p</i> for Trend |
| <b>CRAE</b> |     |                                  |                                  |                                   |                    |
| Model 1     | 386 | Ref                              | 0.6 (-2.6, 3.7)                  | 0.9 (-2.5, 4.2)                   | 0.605              |
| Model 2     | 386 | Ref                              | 0.4 (-2.7, 3.6)                  | 0.8 (-2.5, 4.2)                   | 0.619              |
| Model 3     | 386 | Ref                              | 0.5 (-2.6, 3.7)                  | 0.8 (-2.5, 4.2)                   | 0.621              |
| Model 4     |     | Ref                              | 0.3 (-2.8, 3.5)                  | 0.2 (-3.1, 3.5)                   | 0.901              |
| Model 5     | 190 | Ref                              | -0.5 (-4.9, 3.8)                 | -0.1 (-4.9, 4.6)                  | 0.936              |
| Model 6     | 383 | Ref                              | 0.6 (-2.6, 3.7)                  | 1.3 (-2.0, 4.7)                   | 0.367              |
| <b>CRVE</b> |     |                                  |                                  |                                   |                    |
| Model 1     | 386 | Ref                              | 0.1 (-4.2, 4.4)                  | 0.4 (-4.1, 5.0)                   | 0.849              |
| Model 2     | 386 | Ref                              | -0.2 (-4.4, 4.1)                 | 0.4 (-4.1, 4.9)                   | 0.872              |
| Model 3     | 386 | Ref                              | 0.1 (-4.2, 4.4)                  | 0.4 (-4.1, 5.0)                   | 0.848              |
| Model 4     | 384 | Ref                              | 0.0 (-4.3, 4.2)                  | -0.3 (-4.7, 4.2)                  | 0.908              |
| Model 5     | 190 | Ref                              | 0.8 (-5.3, 6.9)                  | 2.7 (-4.0, 9.4)                   | 0.431              |
| Model 6     | 383 | Ref                              | 0.0 (-4.3, 4.3)                  | 1.0 (-3.5, 5.6)                   | 0.657              |
| <b>PWV</b>  |     |                                  |                                  |                                   |                    |
| Model 1     | 400 | Ref                              | 0.0 (-0.1, 0.1)                  | 0.0 (-0.1, 0.1)                   | 0.464              |
| Model 2     | 400 | Ref                              | 0.0 (-0.1, 0.1)                  | 0.0 (-0.1, 0.1)                   | 0.729              |
| Model 3     | 400 | Ref                              | 0.0 (-0.1, 0.1)                  | 0.0 (-0.1, 0.1)                   | 0.772              |
| Model 4     | 400 | Ref                              | 0.0 (-0.1, 0.1)                  | 0.0 (-0.1, 0.1)                   | 0.930              |
| Model 5     | 202 | Ref                              | 0.0 (-0.2, 0.2)                  | 0.0 (-0.2, 0.1)                   | 0.780              |
| Model 6     | 398 | Ref                              | 0.0 (-0.1, 0.1)                  | 0.0 (-0.1, 0.1)                   | 0.960              |

CI: confidence interval; CRAE: Central retinal artery equivalent; CRVE: Central retinal vein equivalent; PWV: Pulse wave velocity.

Data obtained by linear regression analysis.

Model 1: adjusted for child age, child sex, maternal education, maternal social class, total energy intake, maternal age, paternal cardiovascular history, parity, maternal smoking during pregnancy and maternal pre-pregnancy body mass index

Model 2: Model 1 further adjusted for child height

Model 3: Model 1 further adjusted for child z-score body mass index

Model 4: model 1 further adjusted for blood pressure

Model 5: Model 1 further adjusted for child LDL-cholesterol (9 years visit)

Model 6: Model 1 further adjusted for child fish intake at 11 years (servings per week)
